# Supplementary material for: The pentacyclic triterpenoid, plectranthoic acid, a novel activator of AMPK induces apoptotic death in prostate cancer cells
Source: PubMed Central journal article supplement (PMC4826172; doi:10.18632/oncotarget.6625), 2015-12-16
Supplement: oncotarget-07-3819-s001.pdf [file oncotarget-07-3819-s001.pdf]

SUPPLEMENTARY FIGURES

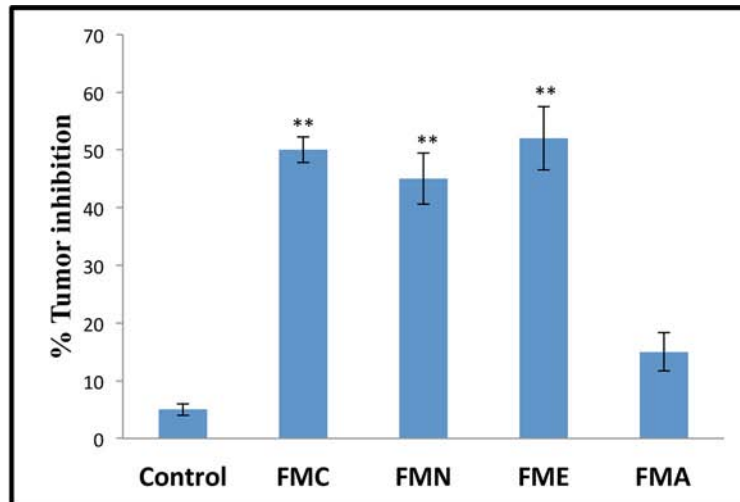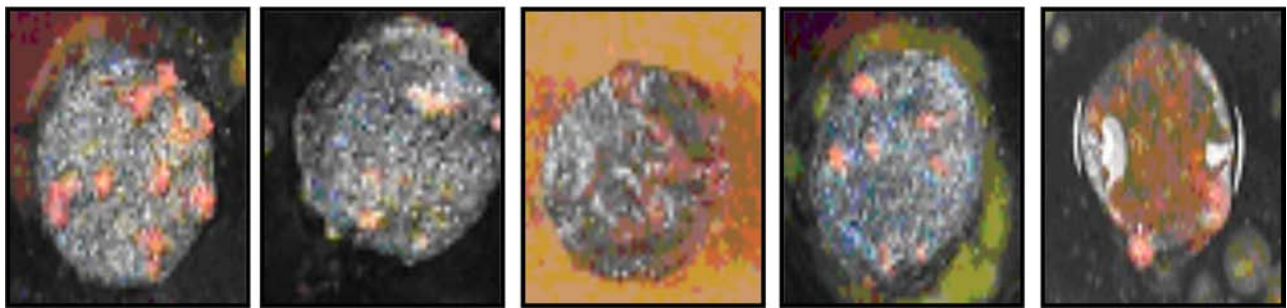

Supplementary Figure S1: Potato disc antitumor assay showing tumor inhibition by *Ficus microcarpa* crude extract (FMC) and its fractions (FMN, FME and FMA).

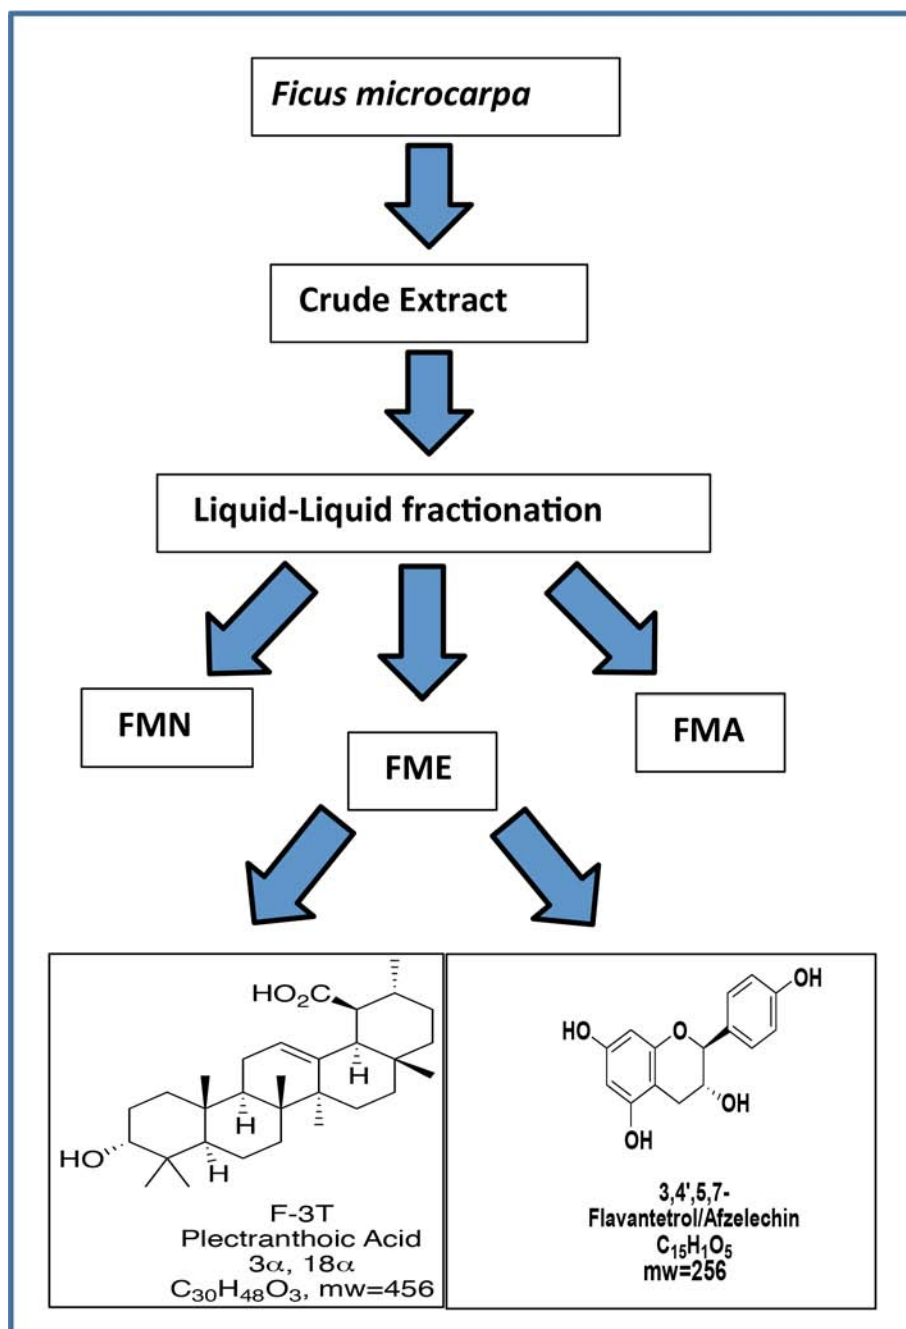

**Supplementary Figure S2: Flow chart for isolation of PA and FL from *Ficus microcarpa*.** Crude extract was separated into 3 fractions (FMN, FME and EMA) by liquid-liquid fractionation and both compounds were extracted from ethyl acetate fraction (FME).

**A**

|     | DU145<br>(IC <sub>50</sub> : μM) | PC3<br>(IC <sub>50</sub> : μM) | CWRV1<br>(IC <sub>50</sub> : μM) | NB26<br>(IC <sub>50</sub> : μM) | A375<br>(IC <sub>50</sub> : μM) |
|-----|----------------------------------|--------------------------------|----------------------------------|---------------------------------|---------------------------------|
| FMC | 67                               | 96                             | 94                               | 97.3                            | 100                             |
| FMN | 70                               | 100.3                          | 97                               | 89.8                            | 116                             |
| FME | 70.4                             | 89                             | 94.1                             | 88.3                            | 108                             |
| FMA | 101                              | 152.3                          | 112.9                            | 72                              | 146.1                           |

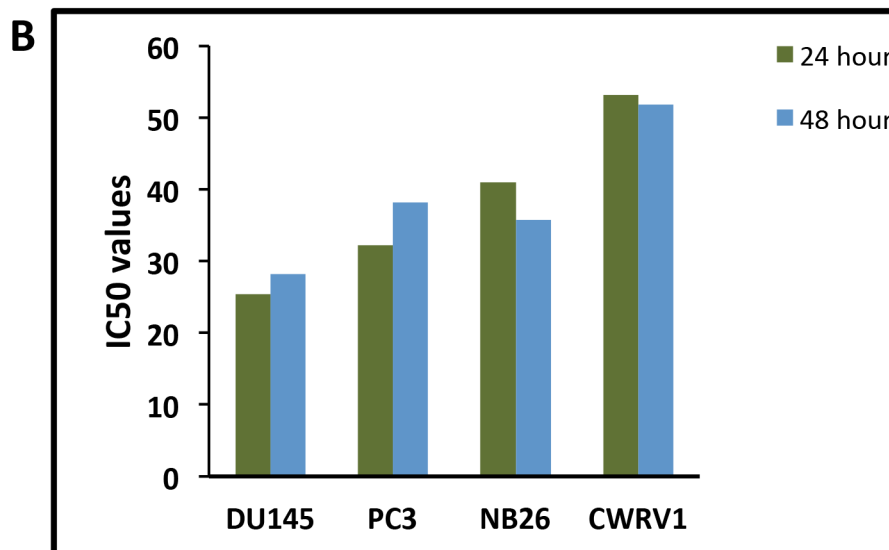

**Supplementary Figure S3: Effects of crude extract and fractions of *Ficus microcarpa* on the viability of melanoma and prostate cancer cells.** **A.** Cells were treated with FMC, FMN, FME and FMC at the indicated concentrations for 24h, and cell viability was assessed by MTT assays IC<sub>50</sub> values are tabulated. **B. Time course analysis of the effect of PA on prostate cancer cells:** DU145, PC3, NB26 and CWRV1 were incubated with PA for 24 and 48h, cell viability was assessed by MTT, and IC<sub>50</sub> values were calculated and plotted.

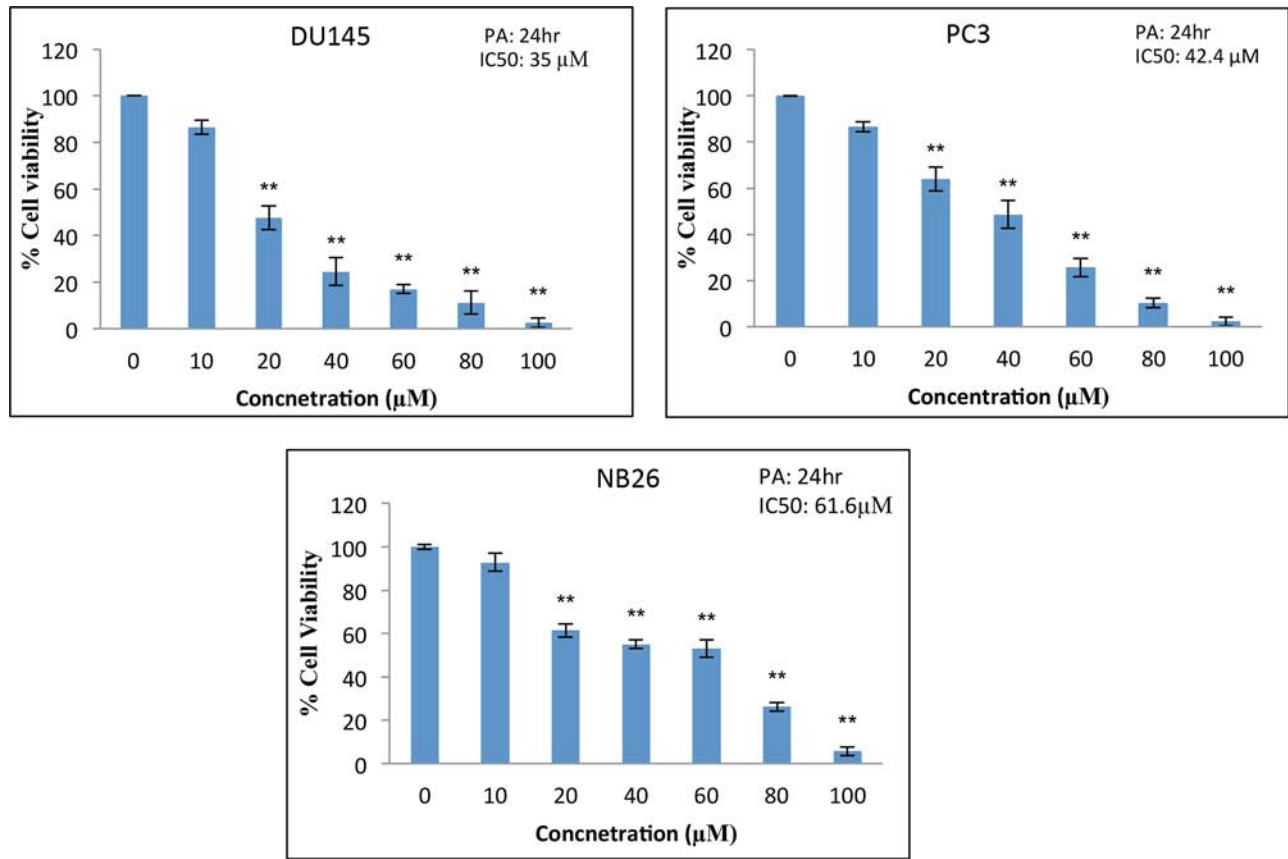

**Supplementary Figure S4: Effects of PA on the viability of prostate cancer cells.** Cells were treated with PA at the indicated concentrations in for 24h, and cell viability was assessed by BrDU assay (Cell Signaling), as per manufacturer’s protocol.

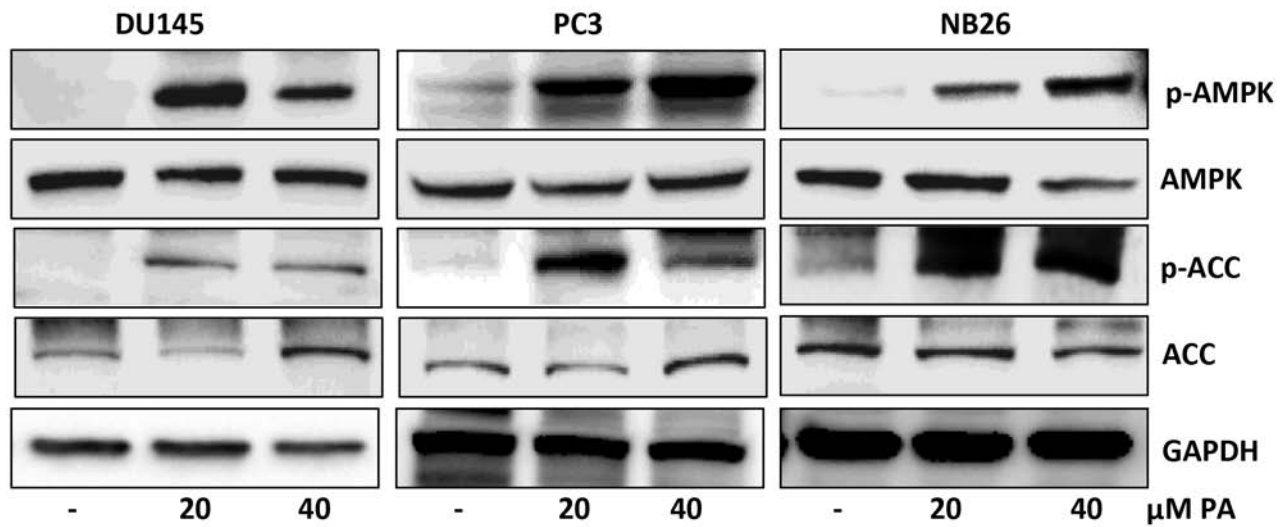

**Supplementary Figure S5: Effects of PA on AMPK signaling.** Whole cell lysates of PC3, NB26 and DU145 cells with/without PA (20–40 μM; 24h) treatment were subjected to SDS-polyacrylamide for expression of p-AMPK, AMPK, p-ACC and ACC. Equal loading was confirmed by reprobing with GAPDH. The immunoblots shown are representative of three independent experiments with similar results.

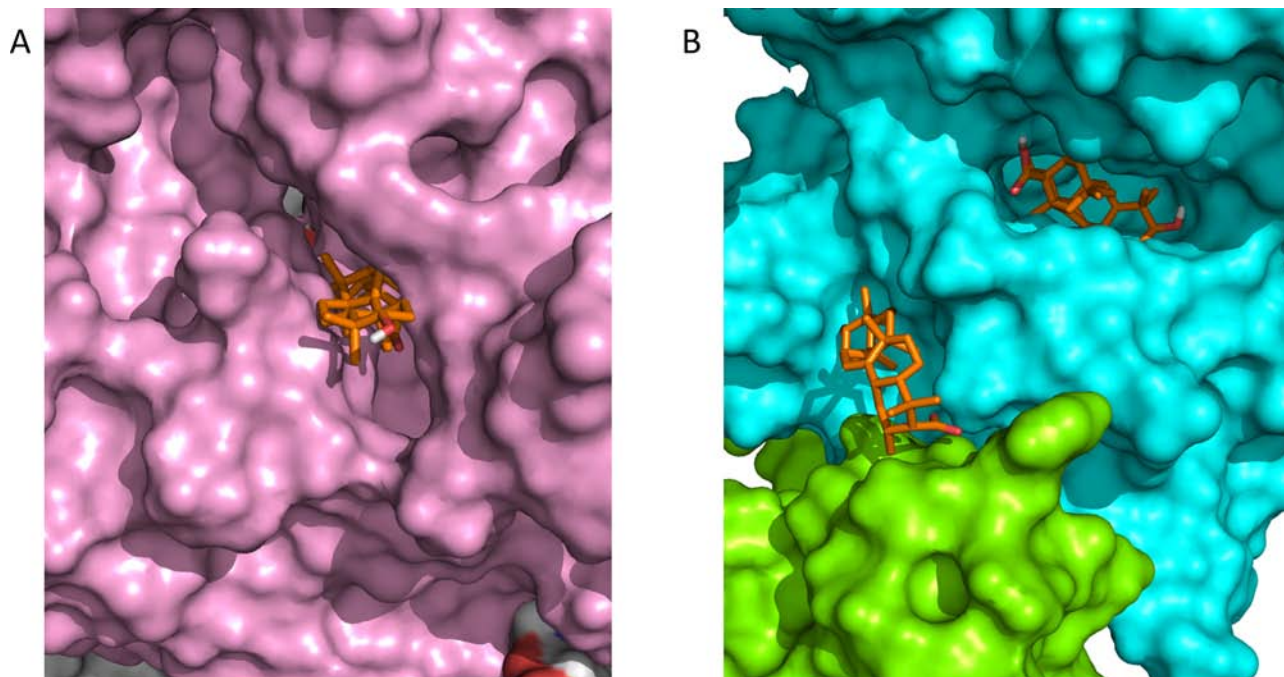

**Supplementary Figure S6: Binding of PA with  $\gamma$ ,  $\alpha$  and  $\beta$  subunits.** PA docked to AMPK by autodoc4. The model used was the AMPK structure with ligands in the PDB entry 4CFE (DOI: 10.1038/ncomms4017, Nature Communications). **A.** Surface pocket shows PA binding at  $\gamma$  subunit. **B.** Surface pocket shows PA binding at  $\alpha$  and  $\beta$  subunits.

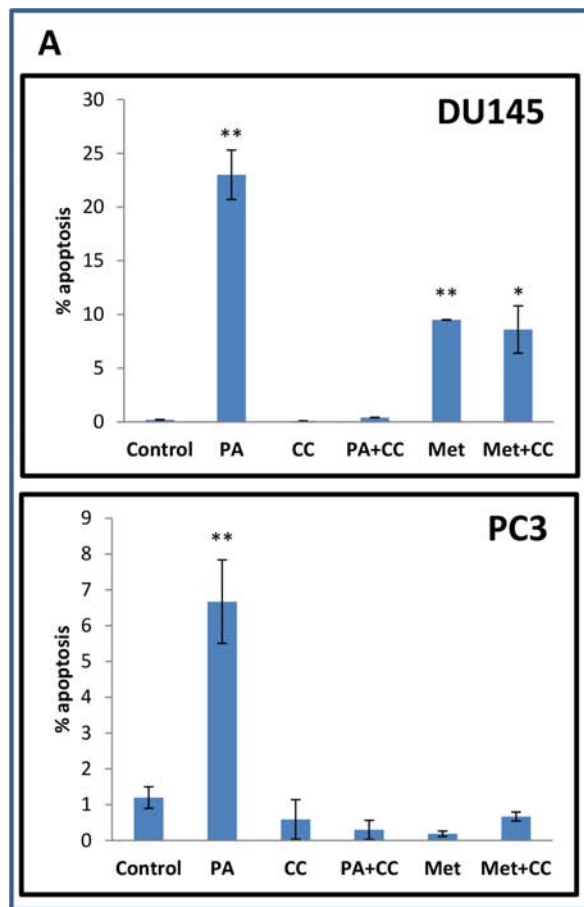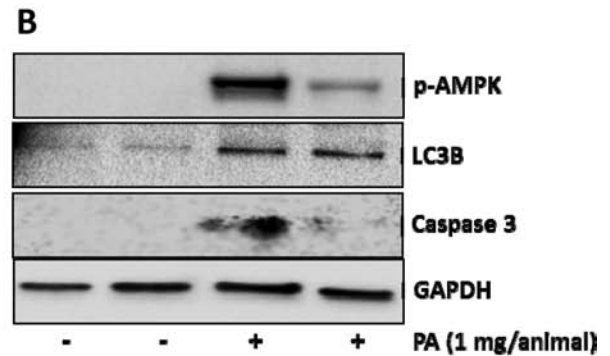

**Supplementary Figure S7: A. PA induces apoptosis in an AMPK dependent manner.** Cells were labeled with FITC and analyzed by flow cytometry. Percentage of apoptotic cells with different treatments are plotted in the graph. The results are expressed as normalized average  $\pm$  S.D. of three independent experiments. **B.** Whole cell lysates of *CWR22Rv1* xenografts implanted in athymic nude mice, treated with/without PA were subjected to SDS-polyacrylamide gel electrophoresis. Equal loading was confirmed by reprobing with GAPDH. The immunoblots shown are representative of three independent experiments with similar results.
